# 1 Abstract concept learning in a simple 2 neural network inspired by the 3 insect brain

4 Alex J. Cope<sup>1,†</sup>, Eleni Vasilaki<sup>1,†</sup>, Dorian Minors<sup>2</sup>, Chelsea Sabo<sup>1</sup>, James A.R.  
5 Marshall<sup>1</sup>, Andrew B. Barron<sup>2,†,2,\*</sup>

\*For correspondence:

6 <sup>1</sup>Department of Computer Science, University of Sheffield, Sheffield, S1 4DP;  
7 <sup>2</sup>Department of Biological Sciences, Macquarie University, Sydney, Australia  
8

<sup>†</sup>These authors contributed equally  
to this work

---

9 **Abstract** The capacity to learn abstract concepts such as ‘sameness’ and ‘difference’ is  
10 considered a higher-order cognitive function, typically thought to be dependent on top-down  
11 neocortical processing. It is therefore surprising that honey bees apparently have this capacity.  
12 Here we report a model of the structures of the honey bee brain that can learn sameness and  
13 difference, as well as a range of complex and simple associative learning tasks. Our model is  
14 constrained by the known connections and properties of the mushroom body, including the  
15 protocerebral tract, and provides a good fit to the learning rates and performances of real bees in  
16 all tasks, including learning sameness and difference. The model proposes a novel mechanism for  
17 learning the abstract concepts of ‘sameness’ and ‘difference’ that is compatible with the insect brain,  
18 and is not dependent on top-down or executive control processing.

---

20 Abstract concepts involve the relationships between things. Two simple and classic examples of  
21 abstract concepts are ‘sameness’ and ‘difference’. These categorise the relative similarity of things:  
22 they are properties of a relationship between objects, but they are independent of, and unrelated  
23 to, the features of the objects themselves. The capacity to identify and act on abstract relationships  
24 is a higher-order cognitive capacity, and one that is considered critical for any operation involving  
25 equivalence or general quantitative comparison (*Wright and Katz, 2007; Piaget and Inhelder, 1969;*  
26 *Daehler and Greco, 1985; Avarguès-Weber and Giurfa, 2013*). The capacity to recognise abstract  
27 concepts such as sameness has even been considered to form the “very keel and backbone of  
28 our thinking” (*James, 1890*). Several non-verbal animals have been shown to be able to recognise  
29 ‘sameness’ and ‘difference’ including, notably, the honey bee (*Wright, 1997, 1992; Giurfa et al., 2001;*  
30 *D’Amato et al., 1985*).

31 The ability of the honey bee to recognise ‘sameness’ and ‘difference’ is interesting, as the learning  
32 of abstract concepts is interpreted as a property of the mammalian neocortex, or of regions of  
33 the avian pallium (*Diekamp et al., 2002; Wallis et al., 2001; Miller et al., 2003*) and to be a form of  
34 top-down executive modulation of lower-order learning mechanisms (*Avarguès-Weber and Giurfa,*  
35 *2013; Miller et al., 2003*). This interpretation has been reinforced by the finding that activity of  
36 neurons in the prefrontal cortex of rhesus monkeys (*Macaca mulatta*) correlates with success in  
37 recognising sameness in tasks (*Wallis et al., 2001; Miller et al., 2003*). The honey bee, however, has  
38 nothing like a prefrontal cortex in its much smaller brain.

39 In this paper we use a modelling approach to explore how an animal like a honey bee might be  
40 able to solve an abstract concept learning task. To consider this issue we must outline in more detail  
41 how learning of sameness and difference has been demonstrated in honey bees, and originally in

42 other animals.

43 A family of 'match-to-sample' tasks has been developed to evaluate sameness and difference  
44 learning in non-verbal animals. In these tasks animals are shown a sample stimulus followed, after  
45 a delay, by two stimuli: one that matches the sample and one that does not. Sometimes delays  
46 of varying duration have been imposed between the presentation of the sample and matching  
47 stimuli to test duration of the 'working memory' required to perform the task (*Wright and Katz,*  
48 *2007; Katz et al., 2007*). This working memory concept is likened to a neural scratchpad that can  
49 store a short term memory of a fixed number of items, previously seen but no longer present  
50 (*Baddeley and Hitch, 1974*). Tests in which animals are trained to choose matching stimuli are  
51 described as Match-to-Sample (MTS) or Delayed-Match-To-Sample (DMTS) tasks, and tests in which  
52 animals are trained to choose the non-matching stimulus are Not-Match-To-Sample (NMTS) or  
53 Delayed-Not-Match-To-Sample (DNMTS) tasks.

54 On their own, match-to-sample tasks are not sufficient to show concept learning of sameness  
55 or difference. For this it is necessary to show, having been trained to select matching or non-  
56 matching stimuli, that the animal can apply the concept of sameness or difference in a new context  
57 (*Avarguès-Weber and Giurfa, 2013*). Typically this is done by training animals with one set of stimuli  
58 and testing whether they can perform the task with a new set of stimuli (*Wright, 1997, 1992; Giurfa*  
59 *et al., 2001; D'Amato et al., 1985*); this is referred to as a transfer test.

60 In a landmark study *Giurfa et al. (2001)* showed that honey bees can learn both sameness and  
61 difference. They could learn both DMTS and DNMTS tasks and generalise performance in both  
62 tasks to tests with new, previously unseen, stimuli (*Giurfa et al., 2001*). In this study free-flying bees  
63 were trained and tested using a Y-maze in which the sample and matching stimuli were experienced  
64 sequentially during flight, with the sample at the entrance to the maze and the match stimuli at  
65 each of the y-maze arms. Bees could solve and generalise both DMTS and DNMTS tasks when  
66 trained with visual stimuli, and could even transfer the concept of sameness learned in an olfactory  
67 DMTS task to a visual DMTS task, showing cross-modal transfer of the learned concept of sameness  
68 (*Giurfa et al., 2001*). Bees took 60 trials to learn these tasks (*Giurfa et al., 2001*); this is much longer  
69 than learning a simple olfactory or visual associative learning task, which can be learned by bees in  
70 3 trials (*Matsumoto et al., 2012*). Their performance in DMTS and DNMTS was not perfect either;  
71 the population average for performance in test and transfer tests was around 75%, but they could  
72 clearly perform at better than chance levels (*Giurfa et al., 2001*) in both.

73 The concept of working memory is crucial for solving a DMTS/DNMTS task, as information about  
74 the sample stimulus is no longer available externally to the animal when choosing between the  
75 match stimuli. If there is no neural information that can identify the match then the task cannot be  
76 solved. We therefore must identify in the honeybee a candidate for providing this information in  
77 order to produce a model that can solve the task.

78 A previous model by *Arena et al. (2013)* demonstrates DMTS and DNMTS with transfer, however  
79 the model contains many biologically unfounded mechanisms that are solely added for the purpose  
80 of solving these tasks, and the outcome of these additions disagrees with neurophysiological,  
81 and behavioural evidence. We instead take an approach of constraining our model strongly to  
82 established neurophysiology and neuronanatomy, and demonstrating behaviour that matches that  
83 of real bees. We will compare this model to the model presented here further in the Discussion.

84 The honey bee brain is structured as discrete regions of neuropil (zones of synaptic contact).  
85 These are well described, as are the major tracts connecting them (*Strausfeld, 2012*). The learning  
86 pathways have been particularly intensely studied (e.g. *Menzel, 2001; Søvik et al., 2015; Giurfa,*  
87 *2007; Galizia, 2014*). The mushroom bodies (*corpora pedunculata*) receive processed olfactory,  
88 visual and mechanosensory input (*Mobbs, 1982*) and are a locus of multimodal associative learning  
89 in honey bees (*Menzel, 2001*). They are essential for reversal and configural learning (*Avarguès-*  
90 *Weber and Giurfa, 2013; Boitard et al., 2015; Devaud et al., 2015*). Avarguès-Weber and Giurfa  
91 (*Avarguès-Weber and Giurfa, 2013*) have argued the mushroom bodies to be the most likely brain  
92 region supporting concept learning, because of their roles in stimulus identification, classification

93 and elemental learning (*Galizia, 2014; Bazhenov et al., 2013; Menzel, 2001*). Yet it is not clear how  
 94 mushroom bodies and associated structures might be able to learn abstract concepts that are  
 95 independent of any of the specific features of learned stimuli and, crucially, how the identity of  
 96 the sample stimulus could be represented. Solving such a problem requires two computational  
 97 components. First, a means of storing the identity of the sample stimulus, a form of working  
 98 memory; second, a mechanism that can learn to use this stored identity to influence the behaviour  
 99 at the decision point. Below we propose a model of the circuitry of the honey bee mushroom  
 100 bodies that can perform these computations and is able to solve DMTS and DNMTS tasks.

## 101 Results

### 102 Key model principles: A circuit model inspired by the honey bee mushroom bodies

103 We explored whether a neural circuit model, inspired and constrained by the known connections of  
 104 the honey bee mushroom bodies, is capable of learning sameness and difference in a DMTS and  
 105 DNMTS task (Figure 1). Full details of the models can be found in Methods.

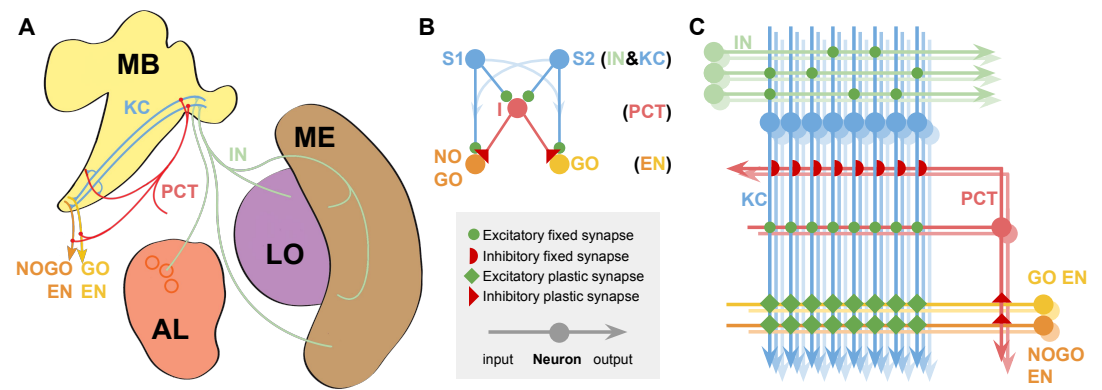

**Figure 1. Models of the mushroom bodies based on known neuroanatomy. A Neuroanatomy: MB** Mushroom Bodies; **AL** Antennal Lobe glomeruli (circles); **ME & LO** Medulla and Lobula optic neuropils. The relevant neural pathways are shown and labelled for comparison with the model. **B** Reduced model; neuron classes indicated at righthand side of sub-figure. **C** Full model, showing the model connectivity and indicating the approximate relative numbers of each neuron type. Colour coding and labels are preserved throughout all the diagrams for clarity. Excitatory and inhibitory connections indicated as in figure legend. Key of neuron types: KC, Kenyon Cells; PCT, Protocerebellar Tract neurons; IN, Input Neurons (olfactory or visual); EN, Extrinsic MB Neurons from the GO and NOGO subpopulations, where the subpopulation with the highest sum activity defines the behavioural choice in the experimental protocol (Figure 2).

106 The mushroom body has previously been modelled as an associative network consisting of  
 107 three neural network layers (*Bazhenov et al., 2013; Huerta and Nowotny, 2009*), comprised of  
 108 input neurons (IN) providing processed olfactory, visual and mechanosensory inputs (*Mobbs, 1982;*  
 109 *Fahrbach, 2006*), an expansive middle layer of Kenyon cells (KC) which enables sparse-coding of  
 110 sensory information for effective stimulus classification (*Galizia, 2014*), and finally mushroom body  
 111 extrinsic neurons (EN) which output to premotor regions of the brain and can be considered (at this  
 112 level of abstraction) to activate different possible behavioural responses (*Galizia, 2014; Bazhenov*  
 113 *et al., 2013*). Here, for simplicity, we consider the EN as simply two subpopulations controlling  
 114 either 'go' or 'no-go' behavioural responses only, which allow choice between different options via  
 115 sequential presentations where 'go' chooses the currently presented option. Connections between  
 116 the KC output and ENs are modifiable by synaptic plasticity (*Bazhenov et al., 2013; Heisenberg,*  
 117 *2003; Schwaerzel et al., 2003; Strube-Bloss et al., 2011*) supporting learned changes in behavioural  
 118 responses to stimuli.

119 As outlined in the introduction, we require two computational mechanisms for solving the  
 120 DMTS/DNMTS task. First is a means of storing the identity of the sample stimulus. Second is learning  
 121 to use this identity to drive behaviour and solve the task. Moreover this learning must generalise to

122 other stimuli. The computational complexity of this problem should not be underestimated; either  
123 the means of storing the identity of the sample, or the behavioural learning, must generalise to  
124 other stimulus sets. The bees were not given any reward with the transfer stimuli in *Giurfa et al.*  
125 *(2001)*'s study, so no post-training learning mechanism can explain the transfer performance. In  
126 addition, during the course of the experiment of *Giurfa et al. (2001)* each of the two stimuli were  
127 used as the match, i.e. for stimuli A and B the stimulus at the maze entrance were alternated  
128 between A and B throughout the training phase of the experiment. This requires, therefore, that  
129 the bees have a sense of stimulus 'novelty', and can associate novelty with a behaviour: either  
130 approach for DNMTS, or avoid for DMTS. With one training set the problem is solvable as delayed  
131 paired non-elemental learning tasks, however with the transfer of learning to new stimulus sets  
132 such an approach does not solve the whole task.

133 There is one feature of the Kenyon Cells which can fulfill this computational requirement for  
134 novelty detection, that of sensory accommodation. In honey bees, even in the absence of reward  
135 or punishment, the KC show a stark decrease in activity between initial and repeated stimulus  
136 presentations of up to 50%, an effect that persists over several minutes (*Szyszkta et al., 2008*). This  
137 effect is also found in *Drosophila melanogaster* (*Hattori et al., 2017*), where there is additionally a  
138 set of mushroom body output neurons that show even starker decreases in response to repeated  
139 stimuli, and which respond to many stimuli with stimulus specific decreases (thus making them  
140 clear novelty detectors), however such a neuron has not been found in bees to date. This response  
141 decrease in Kenyon Cells found in flies and bees is sufficient to influence behaviour during a trial  
142 but, given the decay time of this effect, not likely to influence subsequent trials. The mechanism  
143 behind this accommodation property is not known, and therefore we are only able to model  
144 phenomenologically, which do by reducing the strength of the KC synapses for the sample stimulus  
145 by a fixed factor, tuned to reproduce the reduction in total KC output found by *Szyszkta et al.*  
146 *(2008)* (see Figure 3 panel E). However it should be noted that stimulus-specific adaptation is  
147 shown in many species and brain areas, and can be explained by short-term plasticity mechanisms  
148 (*Tsodyks and Markram, 1997; Vasilaki and Giugliano, 2014; Esposito et al., 2014*) and architectural  
149 constraints only; see for instance *Yarden and Nelken (2017)*.

150 Having identified our first computational mechanism, a memory trace in the form of reduced KC  
151 output for the repeated stimulus, we need only to identify the second, a learning mechanism that  
152 can use this reduced KC output to drive behaviour to choose the correct (matching or non-matching)  
153 arm of the y-maze. If this learning mechanism exists at the output synapses of the KC it is either  
154 specific to the stimulus - if using a pre-postsynaptic learning rule - and therefore cannot transfer,  
155 or it utilises a postsynaptic-only learning rule. Initially the postsynaptic learning rule appears a  
156 plausible solution, however we must consider that bees can learn both DMTS and DNMTS, and that  
157 learning can only occur when the bee chooses to 'go'. This creates a contradiction, as postsynaptic  
158 learning will proportionally raise both the weaker (repeated) stimulus activity, as well as the stronger  
159 (non-repeated) stimulus activity in the GO EN subpopulation. To select 'go' the GO activity for the  
160 currently presented stimulus must be larger than the activity in the NOGO subpopulation, which is  
161 fixed. Therefore we face the contradiction that in the DMTS case the weaker stimulus response must  
162 be higher than the stronger one in the GO subpopulation with respect to their NOGO subpopulation  
163 counterpart responses, yet in the DNMTS case the converse must apply. No single postsynaptic  
164 learning rule can fulfil this requirement.

165 A separate set of neurons that can act as a relay between the KC and behaviour is therefore  
166 required to solve both DMTS and DNMTS tasks. A plausible candidate is the inhibitory neurons that  
167 form the protocerebellar tract (PCT). These neurons have been implicated in both non-elemental  
168 olfactory learning (*Devaud et al., 2015*) and regulatory processes at the KC input regions. They  
169 also project to the KC output regions (*Ganeshina and Menzel, 2001; Haehnel and Menzel, 2010;*  
170 *Rybak and Menzel, 1993; Okada et al., 2007*), where there are reward-linked neuromodulators  
171 and learning-related changes (*Perry and Barron, 2013; Søvik et al., 2015*). These neurons are  
172 few in number in comparison to the KC population, and some take input from large numbers of

173 KC (*Papadopoulou et al., 2011*). We therefore propose that, in addition to their posited role in  
174 modulating and regulating the input to the KC based on overall KC activity (*Papadopoulou et al.,*  
175 *2011*), these neurons could also regulate and modulate the activity of the EN populations at the KC  
176 output regions. Such a role would allow, via synaptic plasticity, a single summation of activity from  
177 the KCs to differentially affect both their inputs and outputs. If we assume a high threshold for  
178 activity for the PCT neurons (again consistent with their proposed role) such that repeated stimuli  
179 would not activate the PCT neurons but non-repeated stimuli would, it is then possible for synaptic  
180 plasticity from the PCT neurons to the EN to solve the DMTS and DNMTS tasks and, vitally, transfer  
181 that learning to novel stimuli. We do not propose that this is the purpose of these neurons, but  
182 instead that it is a consequence of their regulatory role.

183 We present two models inspired by the anatomy and properties of the honey bee brain that  
184 are computationally capable of learning in DMTS and DNMTS tasks, and the generalisation of this  
185 learning to novel stimuli (Figure 1).

186 Our first, reduced, model is a simple demonstration that the key principles outlined above can  
187 solve DMTS and DNMTS tasks, and generalise the learning to novel stimulus sets. By simplifying  
188 the model in this way the computational principles are readily apparent. Such a simple model,  
189 however, cannot demonstrate that associative learning in the KC to EN synapses does not interfere  
190 with learning in the PCT to EN synapses or vice versa. For this we present a full model that includes  
191 the associative learning pathway from the KC to the EN, and demonstrate that this model can not  
192 only solve DMTS and DNMTS with transfer to novel stimuli, but can also solve a suite of associative  
193 learning tasks in which the MB have been implicated. The results of computational experiments  
194 performed with these models are presented below. The full model addresses the interaction of the  
195 PCT to EN learning and the KC to EN learning, as well as suggesting a possible computational role  
196 of the PCT to EN synaptic pathway in regulating the behavioural choices driven by the MB output,  
197 which we present in the Discussion.

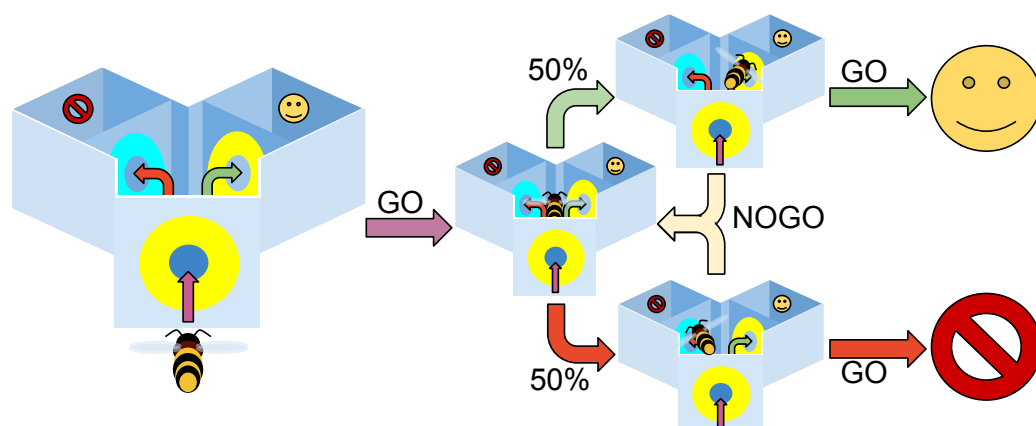

**Figure 2. Experimental protocol for the model.** The model bee is moved between a set of states which describe different locations in the Y-maze apparatus: at the entrance, in the central chamber facing the left arm, in the central chamber facing the right arm, in the left arm or in the right arm. When at the entrance or in the main chamber the bee is presented with a sensory input corresponding to one of the test stimuli; GO selection leads the bee to enter the maze when at the entrance, and to enter an arm and experience a potential reward when facing that arm; NOGO leads the bee to delay entering the maze, or to choose another maze arm uniformly at random, respectively. We can then set the test stimuli presented to match the requirements of a given trial (e.g. entrance (A), main chamber left (A), main chamber right (B) for DMTS when rewarding the left arm, or DNMTS when rewarding the right arm).

198 **A reduced model of the core computational principles produces sameness and dif-**  
199 **ference learning, and transfers this learning to novel stimuli**

200 The reduced model is shown in Figure 1 Panel B and model equations are presented in Methods.  
201 The input nodes  $S_1$  and  $S_2$  represent the two alternative stimuli, where we have reduced the sparse  
202 KC representation into two non-overlapping single nodes for simplicity, and as such we do not need  
203 to model the IN input neurons separately. Node I (which corresponds to the PCT neurons, again  
204 reduced to a single node for simplicity) represents the inhibitory input to the output neurons GO  
205 and NOGO. Nodes  $S_1$  and  $S_2$  project to nodes I and to GO and NOGO with fixed excitatory weighted  
206 connection. Finally, node I projects to GO and NOGO with plastic inhibitory weighted connections.  
207 Node I is thresholded so that it only responds to novel stimuli.

208 Figure 3 panels A and B show the performance of the reduced model bees for task learning  
209 and transfer to novel input stimuli. While the reduced model solves the transfer of sameness and  
210 difference learning the pretraining process strongly biases the model towards non-repeated stimuli,  
211 proportional to the number of pretraining trials. Notably, this bias in the reduced model is different  
212 to that found in the full model, which we discuss below.

213 The model operates by adjusting the weights between the I and the GO to change the likelihood  
214 of choosing the non-matching stimulus. Since only connections from the I (representing the PCT  
215 neuron) to GO neurons are changed, the I to GO/NOGO weights are initialised to half the maximum  
216 weight value. Note that the I node is only active for the non-repeated stimulus, and this pathway  
217 has no effect for repeated stimuli. This means that if the weights are increased then non-repeated  
218 stimuli will have greater inhibition to the GO neuron, and therefore be less likely to be chosen. If  
219 the weights are decreased then non-repeated stimuli will have less inhibition to the GO neuron  
220 and therefore will be more likely to be chosen. As the conditions for changing the weights are only  
221 met when the non-repeated stimulus is chosen for 'go', this means that the model only learns on  
222 unsuccessful trial for DMTS (increasing the weight), or successful trials for DNMTS (decreasing the  
223 weight).

224 **A full model is capable of sameness and difference learning, and transfers this**  
225 **learning to novel stimuli**

226 The full model is shown in Figure 1 Panel C and model equations are presented in Methods. Figure  
227 3 panel D shows the performance of the full model for the first block of learning following from  
228 different numbers of pretraining repetitions. When only the PCT pathway is plastic there is a large  
229 bias towards the non-repeated stimulus due to the pretraining, as found in the reduced model. This  
230 bias is reduced by the presence of the associative learning pathway, and the bias is independent of  
231 the number of pretraining trials for more than 5 trials. It should be noted that the experimental  
232 data (*Giurfa et al., 2001*) show indications of such a bias, in line with the results from the full model.  
233 The reduced model therefore requires fewer pretraining trials than the full model to produce a  
234 similar bias, which leads to the reduced model having large maladaptive behavioural biases for  
235 non-repeated stimuli if all stimuli are rewarded. This is important, as it suggests a role for the PCT  
236 pathway in modulating the behavioural choice of the bee. This possible role is explored further in  
237 the Discussion.

238 Figure 3 panels A and B show the performance of the model bees compared with the perfor-  
239 mance of real bees from *Giurfa et al. (2001)*. In both cases the trends found in the performance  
240 of the model bees match the trends found in the real bees for both task learning and transfer to  
241 novel stimuli. It is important to note the different forms of the learning in the DMTS and DNMTS  
242 paradigms, with DNMTS slower to learn. This is a direct consequence of the inhibitory nature of the  
243 PCT neurons; excitatory neurons performing the role of the PCT neurons in the model would lead  
244 to a reversal of this feature, with DMTS learning more slowly.

245 **Learning in the PCT pathway of the full model is essential for transfer of learning**  
 246 **to novel stimuli**

247 We next sought to confirm that learning in the PCT neuron to EN pathway enabled generalisable  
 248 learning of sameness and difference. Computational modelling provides powerful tools with which  
 249 to do this, by comparing model performance when different elements are suppressed with the full  
 250 model. We selectively suppressed the KC associative learning pathway, the PCT pathway learning,  
 251 and all learning in the model. When a learning mechanism is suppressed this means that the  
 252 synaptic weights stay the same throughout the training, but the pathway is otherwise active.

253 The results are summarised in Figure 3 panel C. It can clearly be seen that within our model  
 254 learning in the PCT pathway is necessary for transfer of the sameness and difference learning to  
 255 novel stimuli. Associative learning via the KC pathway alone has no effect on the transfer task  
 256 performance compared to the fully learning-suppressed model. Unsuppressed associative learning  
 257 leads to a preference for the matched stimulus, which has weaker KC activity, but this learning is  
 258 specific to the trained stimuli, and does not transfer to novel stimuli.

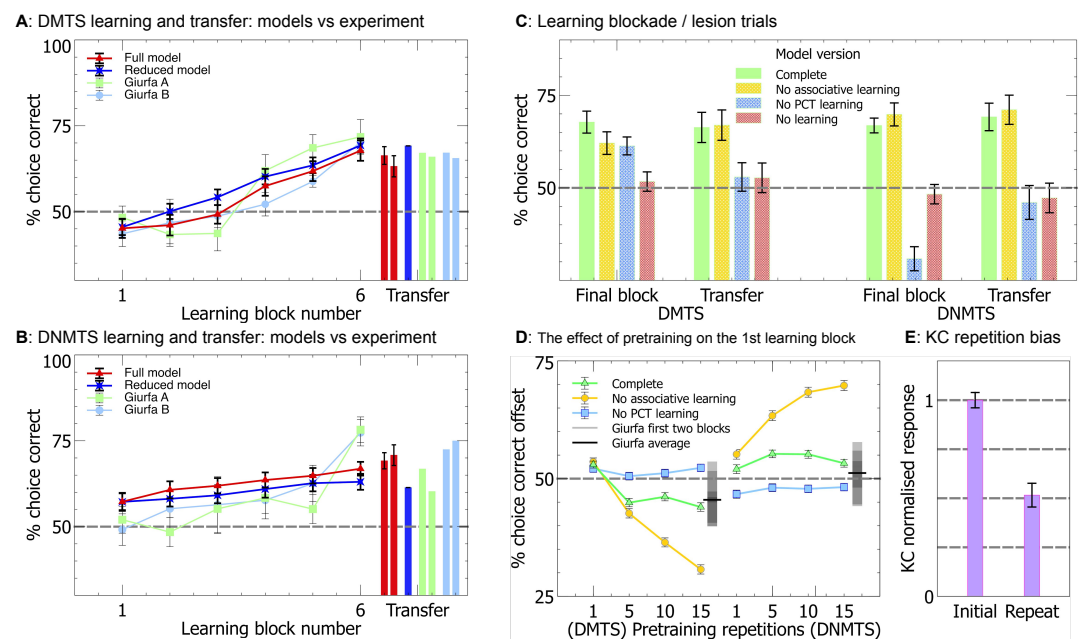

**Figure 3. The full and reduced versions of our model reproduce the transfer of sameness and difference learning.** **A & B** The average percentage of correct choices made by the model and real bees within blocks of ten trials as the task is learned (lines), along with the transfer of learning onto novel stimulus sets (bars). Both versions of the model reproduce the pattern of learning acquisition for DMTS (Full: N=338, Reduced: N= 360) and DNMTS (Full & Reduced: N=360) found when testing real bees (test for learning:  $P < 0.0001$ ), along with the transfer of learning ( $P < 0.0001$ ). For DMTS *Giurfa A & B* are the data from Experiments 1 & 2 respectively from *Giurfa et al. (2001)*, and for DNMTS *Giurfa A & B* are the data from Experiments 5 & 6 respectively from the same source. For an explanation of the initial offsets from chance for the model please see the text for panel D. **C** The blockade of plasticity from the MB and PCT pathways shows that the PCT pathway is necessary and sufficient for sameness and difference learning in the full model. All non-overlapping SEM error bars are significantly different. **D** PCT pathway learning in the absence of associative learning leads to preference for non-matching stimuli following pre-training, demonstrating that learning in the associative pathway changes the form of the sameness and difference acquisition curves. The equivalent offsets and error ranges for the first two blocks of *Giurfa* Experiments 1, 2, 5 & 6 along with the averages for DMTS and DNMTS for these blocks are shown alongside the model data for comparison as overlapping grey boxes - overlapping boxes create darker regions, thus the area of greatest darkness is the point where the most of the error ranges overlap. **E** The average activity of the model KC neurons when presented with repeated stimuli.

259 **Validation: the full model is capable of performing a range of conditioning tasks**  
260 Many models have reproduced the input neuron to Kenyon Cell to Extrinsic neuron pathway (*Huerta*  
261 *et al., 2004; Huerta and Nowotny, 2009; Bazhenov et al., 2013; Peng and Chittka, 2016*), and these  
262 models demonstrate many forms of elementary and complex associative learning that have been  
263 attributed to the mushroom bodies. It is therefore important to demonstrate that in our model then  
264 PCT neuron pathway does not affect the reproduction of such learning behaviours. We therefore  
265 tested elemental and non-elemental associative learning undertaken by conditioning the PER in  
266 restrained bees, and reversal learning in free flying bees, as described in Methods. Our model  
267 is capable of reproducing the results found in experiments involving real bees, with the model's  
268 acquisition curves showing similar to the performance to the real bees. The results are shown in  
269 Figure 4.

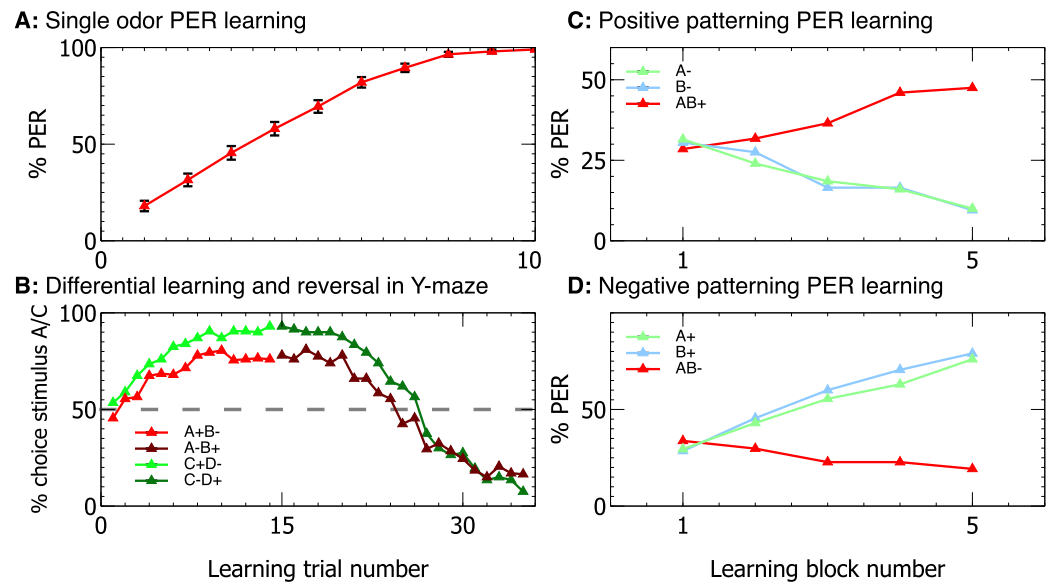

**Figure 4. The full model is capable of performing a range of conditioning tasks.** With modification of only the experimental protocol, our full model can successfully perform a range of conditioning tasks which can be performed by restrained (using the Proboscis Extension Reflex (PER) paradigm) and free flying bees. Performance closely matches experimental data with real bees (e.g. **A:***Bitterman et al. (1983)*, **B:***Giurfa (2004)*, **C & D:***Deisig et al. (2001)*).

## 270 Discussion

271 We have presented a simple neural model that is capable of learning the concepts of sameness and  
272 difference in Delayed Match to Sample (DMTS) and Delayed Not Match to Sample (DNMTS) tasks.  
273 Our model is inspired by the known neurobiology of the honey bee, and is capable of reproducing  
274 the performance of honey bees in a simulation of DMTS and DNMTS tasks. Our model therefore  
275 proposes a hypothesis for how animals like the honey bee might be able apparently to learn abstract  
276 concepts.

277 Abstract concept learning is typically described as a higher-order cognitive capacity (*Wright*  
278 *and Katz, 2007; Avarguès-Weber and Giurfa, 2013*), and one that is dependent on a top-down  
279 modulation of simpler learning mechanisms by a higher cognitive process (*Moore et al., 2012*). By  
280 contrast our model proposes a solution to sameness and difference learning in DMTS-style tasks  
281 with no top-down structure. The actions of the PCT neurons are integrated with the KC learning  
282 pathway and provide a parallel processing pathway sensitive to stimulus magnitude, rather than a  
283 top-down imposition of a learned concept of sameness or difference (Figure 1). This is a radical new  
284 proposal for how an abstract concept might be learned by an animal brain.



285 The first question we must ask when constructing a model regards plausibility. Our model  
286 (Figure 1) shows a close match to the neuroanatomical data for the mushroom bodies. Several  
287 computational requirements of our model match with experimental data, notably the sensory  
288 accommodation in the response of the KC neurons. Previous neural models based on this structure  
289 have proposed mechanisms for various forms of associative learning, including extinction of  
290 learning, and positive and negative patterning (*Bazhenov et al., 2013; Arena et al., 2013; Peng and*  
291 *Chittka, 2016*). Our model is also capable of solving a range of stimulus-specific learning tasks,  
292 including patterning (Figure 4). No plausible previous model of the MB or the insect brain has been  
293 capable of learning abstract concepts, however.

294 As mentioned in the Introduction, a previous model by *Arena et al. (2013)* demonstrates DMTS  
295 and DNMTS with transfer. Their motivation is the creation of a model for robotic implementation,  
296 rather than reproduction of behavioural observations from honey bees. While we suggest a role  
297 for the PCT neurons given experimental evidence of changes in the response of Kenyon Cells to  
298 repeated stimuli, Arena et al.'s model assumes resonance between brain regions that is dependent  
299 upon the time after stimulus onset and the addition of specific neurons for 'Match' and 'Non-match';  
300 there is no biological evidence for either of these assumptions. Furthermore, the outcome of these  
301 additions is an increase in Kenyon cell firing in response to repeated stimuli; this is in opposition  
302 to neurophysiological evidence from multiple insect species, including honey bees (*Szyszka et al.,*  
303 *2008; Hattori et al., 2017*). In addition, Arena et al.'s proposed mechanism does not replicate the  
304 difficulty honey bees have in learning DMTS/DNMTS tasks, exhibiting learning in three trials, as  
305 opposed to 60 in real bees. In contrast, our model captures the rate and form of the learning found  
306 in real honey bees.

307 To enable a capacity for learning the stimulus-independent abstract concept of sameness  
308 or difference our model uniquely includes two interacting pathways. The KC pathway of the  
309 mushroom bodies retains stimulus-specific information and supports stimulus-dependent learning.  
310 The PCT pathway responds to summed activity across the KC population and is therefore largely  
311 independent of any stimulus-specific information. This allows information on stimulus magnitude,  
312 independent of stimulus specifics, to influence learning. Including a sensory accommodation  
313 property to the KCs (*Szyszka et al., 2008*) makes summed activity in the KCs in response to a  
314 stimulus sensitive to repetition, and therefore stimuli encountered successively (same) cause a  
315 different magnitude of KC response to novel stimuli (different) irrespective of stimulus specifics.  
316 This model is capable of learning sameness and difference rules in a simulation of the Y-maze DMTS  
317 and DNMTS tasks applied to honey bees (Figure 3), but in theory it could also solve other abstract  
318 concepts related to stimulus magnitude such as quantitative comparisons (*Avarguès-Weber and*  
319 *Giurfa, 2013; Avarguès-Weber et al., 2014*).

320 Our model demonstrates a bias towards non-repeated stimuli, induced by the combination  
321 of sensory accommodation in the KC neurons and PCT learning during the pretraining phase,  
322 and largely mitigated by associative learning in the KC to EN synapses. This bias (see Figure 3) is  
323 indicated in the data from *Giurfa et al. (2001)*, and could be confirmed by further experimentation.

324 We note, however, that our model only supports a rather limited form of concept learning of  
325 sameness and difference. Learning in the model is dependent on sensory accommodation of the  
326 KCs to repeated stimuli (*Szyszka et al., 2008*). This effect is transient, and hence the capacity to learn  
327 sameness or difference will be limited to situations with a relatively short delay between sample  
328 and matching stimuli. This limitation holds for honey bee learning of DMTS tasks (*Zhang et al.,*  
329 *2005*), but many higher vertebrates do not have this limitation *Lind et al. (2015)*. For example, in  
330 capuchins learning of sameness and difference is independent of time between sample and match  
331 (*Wright and Katz, 2006*). We would expect that for animals with larger brains and a developed  
332 neocortex (or equivalent) many other neural mechanisms are likely to be at play to reinforce  
333 and enhance concept learning, enabling performance that exceeds that demonstrated for honey  
334 bees. Monkey pre-frontal cortex (PFC) neurons demonstrate considerable stimulus-specificity in  
335 matching tasks, and different regions appear to have different roles in coding the salience of these

336 stimuli (*Seger and Miller, 2010; Tsujimoto et al., 2011*). Recurrent neural activity between these  
337 selective PFC neurons and lower-order neural mechanisms could support such time independence.  
338 Language-trained primates did particularly well on complex identity matching tasks and the ability  
339 to form a language-related mental representation of a concept might be the reason (*Premack, 1978;*  
340 *Premack and Premack, 1983; Thompson and Oden, 1995*).

341 Wright and Katz (*Wright and Katz, 2007*) have utilised a more elaborate form of a MTS task in  
342 which vertebrates simultaneously learn to respond to sameness and difference, and are trained  
343 with large sets of stimuli rather than just two. They argue this gives less-ambiguous evidence of  
344 true concept learning since both sameness and difference are learned during training, and the  
345 large size of the training stimulus set encourages true generalisation of the concept. In theory our  
346 model could also solve this form of task, but it is unlikely a honey bee could. Capuchins, rhesus and  
347 pigeons required hundreds of learning trials to learn and generalise the sameness and difference  
348 concepts (*Wright and Katz, 2007*). Bees would not live long enough to complete this training,

349 Finally as a consequence of our model we question whether it is necessary to consider abstract  
350 concept learning to be a higher cognitive process. Mechanisms necessary to support it may not be  
351 much more complex than those needed for simple associative learning. This is important because  
352 many behavioural scientists still adhere to something like Lloyd Morgan's Canon (*Lloyd Morgan,*  
353 *1903*), which proposes that "in no case is an animal activity to be interpreted in terms of higher  
354 psychological processes if it can be fairly interpreted in terms of processes which stand lower in  
355 the scale of psychological evolution and development" (*Lloyd Morgan (1903)* p59). Yet the Canon is  
356 therefore reliant on an unambiguous stratification of cognitive processes according to evolutionary  
357 history and development (*Sober, 2015*). If abstract concept learning is in fact developmentally quite  
358 simple, evolutionarily old and phylogenetically widespread, then Morgan's Canon would simply beg  
359 the question of why even more animals do not have this capacity (*Mikhalevich, 2015*). We argue  
360 that far more information on the precise neural mechanisms of different cognitive processes, and  
361 the distribution of cognitive abilities across animal groups, is needed in order to properly rank  
362 capacities as higher or lower.

## 363 **Methods**

### 364 **Model parameter selection**

365 Many of the parameters of the model were fixed by the neuroanatomy of the honey bee, as well  
366 as the previous values and procedures described in *Bazhenov et al. (2013)*, with the following  
367 modifications.

368 First, we increased the sparseness of the connectivity from the PN to the KC.

369 Second, the reduction in the magnitude of the KC output to repeated stimuli was tuned to  
370 replicate the magnitude of reduction described in *Szyszka et al. (2008)*.

371 Third, the learning rates were set so that acquisition of a single stimulus is rapid. In addition  
372 there are two ratios from this initial value that must be set. These are the ratio of the speed of  
373 excitatory associative learning in the Kenyon Cell to Extrinsic Neuron pathway to the inhibitory  
374 learning in the Protocerebellar Tract to Extrinsic Neuron pathway, and the ratio of the speed of  
375 acquisition when rewarded to the speed to extinction when no reward is given. We conservatively  
376 set both of these ratios to 2:1, with excitatory learning faster than inhibitory learning, and extinction  
377 faster than acquisition.

378 Finally, we tuned the threshold value for the PCT neurons so that they only responded to a new  
379 stimulus, and not a repeated one.

380 A full list of the parameters can be found in Table 1.

### 381 **Reduced Model**

382 The reduced model is shown in Figure 1, and described in the text in Results. Here are the equations  
383 governing the model.

**Table 1.** Model parameters; all parameters are in arbitrary units

| Name                    | Value | Name          | Value |
|-------------------------|-------|---------------|-------|
| <b>Full</b>             |       |               |       |
| $N_{IN}$                | 144   | $N_{KC}$      | 5000  |
| $N_{EN}$                | 8     | $N_{PCT}$     | 6     |
| $p_{IN \rightarrow KC}$ | 0.02  |               |       |
| $b$                     | 1.2   | $b_s (l > 0)$ | 150   |
| $b_s (l = 0)$           | 120   |               |       |
| <b>Reduced</b>          |       |               |       |
| $c$                     | 80    | $d_0$         | 1     |
| <b>Shared</b>           |       |               |       |
| $\lambda_e$             | 0.06  | $\lambda_i$   | 0.03  |
| $R_b$                   | 2/3   |               |       |

384 The input node  $S_1$  projects to node I via a fixed excitatory weight of 1.0 and to GO and NOGO  
 385 with excitatory weights  $w_{GO,S_1}^e$  and  $w_{NOGO,S_1}^e$  correspondingly (superscript denotes *excitatory* and  
 386 subscript the connection from neuron  $S_1$  to GO/NOGO). Similarly, node  $S_2$  projects to I via an  
 387 excitatory weight  $w_{I,S_2}^e$  and to GO and NOGO with excitatory weights  $w_{GO,S_2}^e$  and  $w_{NOGO,S_2}^e$ . Finally,  
 388 node I projects to GO and NOGO with inhibitory weights  $w_{GO,I}^i$  and  $w_{NOGO,I}^i$  correspondingly. Node I  
 389 is a threshold linear neuron with a cut-off at high values of activity  $x_{max}$ . Nodes GO and NOGO are  
 390 linear neurons, with activities restricted between

391 The model is described by the following equations, where only one input node  $S_1$  or  $S_2$  are active  
 392 (but not both, as the bee observes one option at a time), where the activities of neurons I, GO and  
 393 NOGO are calculated by:

$$I = S_i \Theta(S_i > \theta) \quad (1)$$

394

$$GO = w_{GO,S_i}^e S_i - w_{GO,I}^i I \quad (2)$$

395

$$NOGO = w_{NoGo,S_i}^e S_i - w_{NoGo,I}^i I \quad (3)$$

396 where  $i = 1, 2$  is an index taking values depending on which stimulus is present ( $S_1$  or  $S_2$ ), and  
 397 neuronal activities of I, GO and NOGO are constrained between  $x_{min}$  and  $x_{max}$ . If a stimulus has been  
 398 shown twice, during its second presentation there is a suppression of the neuronal activity that  
 399 represents the specific stimulus, consistent with experimental findings *Szyszka et al. (2008)*. This is  
 400 modelled as a reduction by a factor of 0.7 of the value  $S_i$  for the repeated stimuli.

401 To calculate the probability of the behavioral outcome of GO or NOGO being the winner we  
 402 use the following equation:

$$P(GO) = \frac{1}{1 + e^{-(c-d)(GO-NOGO)}}, \quad (4)$$

403

$$P(NOGO) = 1 - P(GO). \quad (5)$$

404 where  $c$  is a fixed coefficient and  $d$  a bias that increases linearly with the time it takes to make a  
 405 decision, in the following way:

$$d = \frac{k}{d_o}, \quad (6)$$

406 with  $k$  being the number of consequent iterations for which GO has not been selected, set at zero at  
 407 the beginning of each stimulus presentation. The parameter  $d_o$  is a constant, and selected so that  
 408 the factor  $c - d$  will always be positive. This parameterisation makes sure that the longer it takes for  
 409 a decision GO to be made, the higher the probability that GO will be chosen at the next step.

410 Inhibitory synaptic weights  $w^i$  are learned using the following equation:

$$\Delta w^i = -\lambda_i(R - R_b) \text{ presynaptic activity} \times \text{postsynaptic activity}, \quad (7)$$

411 where  $\lambda_i$  is the learning rate of the inhibitory weights, reward  $R = 1$  if reward is given, and zero  
 412 in all other cases,  $R_b$  is a reward baseline, and the presynaptic (postsynaptic) activity is 1 if the  
 413 presynaptic (postsynaptic) neuron is active and 0 elsewhere. This is a reward-modulated Hebbian  
 414 rule also known as a three factor rule *Vasilaki et al. (2009)*; *Richmond et al. (2011)*.

415 Additional neuronal inputs with similar connectivity as  $S_1$  and  $S_2$ , not shown explicitly in the  
 416 diagram, are also present in the model simulations, and the constructing the equations for these  
 417 simply requires substitution of  $S_i$  for  $T_i$  in Equations 1, 2 and 3. These represent the transfer stimulus  
 418 and can be used following training to demonstrate transfer of learning. Details of training the  
 419 model can be found in the Experiment subsection of the Methods.

### 420 Full Model

421 The full model is shown in Figure 1. Our model builds on a well established abstraction of the  
 422 mushroom body circuit (see *Huerta et al. (2004)*; *Huerta and Nowotny (2009)*; *Bazhenov et al.*  
 423 *(2013)*) to model simple learning tasks.

424 The main structure of the model consists of an associative network with three neural network  
 425 layers. Adapting terminology and features from the insect brain we label these: input neurons (IN)  
 426 (corresponding to S in the Reduced Model), a large middle layer of Kenyon cells (KC) (corresponding  
 427 to the S to GO / NOGO connections in the Reduced Model), and a small output population of  
 428 mushroom body extrinsic neurons (EN) separated into GO and NOGO subsets (as in the Reduced  
 429 Model). The connections,  $c_{ij}$ , between the IN and KC are fixed, and are randomly selected from the  
 430 complete connection matrix with a fixed probability  $p_{IN \rightarrow KC} = 0.02$ . Connections from the KC to  
 431 the EN are plastic, consisting of a fully connected matrix. The connection strength between the  
 432  $j$ th KC and the  $k$ th EN ( $w_{jk}$ ) can take a value between zero and one. The neural description used  
 433 in the entire model is linear with a bottom threshold, and contains no dynamics, consisting of a  
 434 summation over the inputs followed by thresholding at a value  $b$  via a Heaviside function  $\Theta$ , with  
 435 a linear response above the threshold value. This gives the associative model as the following,  
 436 where the outputs of  $i$ th,  $j$ th and  $k$ th neurons of the IN, KC and EN populations are  $x_i$ ,  $y_j$  and  $z_k$   
 437 respectively, and  $M$  describes the modulation of KC activity for the stimulus seen at the maze  
 438 entrance:

$$M = \begin{cases} 1.0 & \text{: at maze entrance} \\ 1.0 & \text{: in arms if } y_j = 0 \text{ (KC inactive) at entrance} \\ 0.7 & \text{: in arms if } y_j > 0 \text{ (KC active) at entrance} \end{cases} \quad (8)$$

$$y_j = M \Theta \left( \sum_{i=0}^{N_{IN}} c_{ij} x_i - b \right) \left( \sum_{i=0}^{N_{IN}} c_{ij} x_i - b \right) \quad (9)$$

$$z_k = \Theta \left( \sum_{j=0}^{N_{KC}} w_{jk} y_j \right) \left( \sum_{j=0}^{N_{KC}} w_{jk} y_j \right) \quad (10)$$

439 where  $N_{IN}$  is the number of IN and  $N_{KC}$  is the number of KC.

440 DMTS generalisation is performed by the inhibitory protocerebral tract (PCT) neurons  $s_l$  (corre-  
 441 sponding to I in the Reduced Model) described by the following equations:

$$s_l = \Theta \left( \sum_{j=0}^{N_{KC}} x_j - b_s \right) \left( \sum_{j=0}^{N_{KC}} x_j - b_s \right) \quad (11)$$

$$y_j = \Theta \left( \sum_{i=0}^{N_{IN}} c_{ij} x_i - b - \sum_{l=0}^{N_{PCT}} s_l^* \right) \left( \sum_{i=0}^{N_{IN}} c_{ij} x_i - b - \sum_{l=0}^{N_{PCT}} s_l^* \right) \quad (12)$$

$$z_k = \Theta \left( \sum_{j=0}^{N_{KC}} w_{jk} x_j - 0.5 \sum_{l=0}^{N_{PCT}} w_{lk}^i s_l \right) \left( \sum_{j=0}^{N_{KC}} w_{jk} x_j - 0.5 \sum_{l=0}^{N_{PCT}} w_{lk}^i s_l \right) \quad (13)$$

442 Where  $w_{lk}$  are the inhibitory weights between the PCT neurons. The \* denotes 10 iteration  
 443 delayed activity from the PCT neurons due to delays in the KC->PCT->KC loop.

444 Learning takes place according to equation (7), and the following equation for excitatory  
 445 synapses:

$$\Delta w^e = \lambda_e (R - R_b) \text{ presynaptic activity} \times \text{postsynaptic activity}, \quad (14)$$

446 where  $\lambda_e$  is the learning rate of the excitatory weights, reward  $R = 1$  if reward is given, and zero  
 447 in all other cases,  $R_b$  is a reward baseline, and the presynaptic (postsynaptic) activity is 1 if the  
 448 presynaptic (postsynaptic) neuron is active and 0 elsewhere.

449 Similarly to the reduced model, a decision is made when the GO EN subpopulation activity is  
 450 greater than the NOGO EN population by a bias  $Rd$ , where  $d$  increases every time a NOGO decision  
 451 is made by 10.0, and  $R$  is a uniform random number in the range  $[-0.5, 0.5]$ . To prevent early  
 452 decisions the sum of the whole EN population activity must be greater than 0.1.

## 453 Experiment

454 Our challenge is to reproduce Giurfa et al's data demonstrating bees solving DMTS and DNMTS  
 455 tasks (Giurfa et al., 2001). To aid exploration of our model we simplify the task it must face, while  
 456 retaining the key elements of the problem as faced by the honeybee. We therefore embody our  
 457 model in a world described by a state machine. This simple world sidesteps several navigation  
 458 problems associated with the real world, however we believe that for the sufficiency proof we  
 459 present here such simplifications are acceptable - the ability of the honeybee to form distinct  
 460 and consistent neural representations of the training set stimuli as it flies through the maze is a  
 461 prerequisite of solving the task, and is therefore assumed.

462 The experimental paradigm for our Y-maze task is shown in Figure 2. The model bee is moved  
 463 between a set of states which describe different locations in the Y-maze apparatus: at the entrance,  
 464 in the central chamber facing the left arm, in the central chamber facing the right arm, in the left  
 465 arm or in the right arm. When at the entrance or in the main chamber the bee is presented with a  
 466 sensory input corresponding to one of the test stimuli. We can then set the test stimuli presented  
 467 to match the requirements of a given trial (e.g. entrance (A), main chamber left (A), main chamber  
 468 right (B) for DMTS when rewarding the left arm, or DNMTS when rewarding the right arm).

## 469 Experimental environment

470 The experimental environment consists of a simplified Y-maze (see Figure 2: main paper), in which  
 471 the model bee can assume one of three positions: at the entrance to the Y-maze; at the choice  
 472 point in front of the left arm; at the choice point in front of the right arm. At each position there  
 473 are two choices available to the model: go and no-go. Go is always chosen at the entrance to the  
 474 Y-maze as bees that refuse to enter the maze would not continue the experiment. Following this  
 475 there is a random choice of one of the two maze arms, left or right. If the model chooses no-go  
 476 this procedure is repeated until the model chooses to go. As no learning occurs at this stage it  
 477 is possible for the model to constantly move between the two arms, never choosing to go. To

478 prevent this eventuality we introduce a Uniformly distributed random bias  $B$  to the go channel that  
479 increases with the number of times the model chooses no-go ( $N$ ):  $B = 10N(\mathcal{U}[0, 1] - 0.5)$ .

480 The IN neurons are divided into non-overlapping groups of 8 neurons, each representing a  
481 stimulus. These are:

- 482 • Z: Stimulus for pretraining
- 483 • A: Stimulus for training pair
- 484 • B: Stimulus for training pair
- 485 • C: Stimulus for transfer test pair
- 486 • D: Stimulus for transfer test pair
- 487 • E: Stimulus for second transfer test pair
- 488 • F: Stimulus for second transfer test pair

489 Each group contains neurons which are zero when the stimulus is not present, and a value of  
490  $1 - \mathcal{U}[-0.05, 0.05]$  - consistent across the experiment for each bee, but not between bees - when  
491 active.

## 492 **DMTS / DNMTS experimental procedure**

### 493 **Models as animals**

494 We use the 'models as animals' principle to reproduce the experimental findings of *Giurfa et al.*  
495 (2001), creating many variants of the model which perform differently in the experiments. To do  
496 this we change the random seed used to generate the connectivity  $c_{ij}$  between the IN and the KC  
497 neurons. For these experiments we use 360 model bee variants, each of which is individually tested,  
498 as this matches the number of bees in *Giurfa et al. (2001)*.

### 499 **Pretraining familiarisation**

500 As is undertaken in the experiments with real bees, we first familiarise our naive model bees  
501 with the experimental apparatus. This is done by first training ten rewarded repetitions of the bee  
502 entering the Y-maze with a stimulus not used in the experiment. In these cases the model does not  
503 choose between go and no-go, it is assumed that the first repetition represents the model finding  
504 the Y-maze and being heavily enough rewarded to complete the remaining repetitions. Following  
505 these ten repetitions the bee is trained with ten repetitions to travel to each of the two arms of  
506 the Y-maze. This procedure ensures that the bees will enter the maze and the two arms when the  
507 training begins, allowing them to learn the task.

### 508 **Training**

509 The training procedure comprises 60 trials in total, divided into blocks of 10 trials. The protocol  
510 involves a repeated set of four trials: two trials with each stimulus at the maze entrance, with each  
511 of these two trials having the stimulus at the maze entrance on different arms of the apparatus. In  
512 the case of match-to-sample the entrance stimulus is rewarded and the non-entrance stimulus is  
513 punished, and vice versa for not-match-to-stimulus.

### 514 **Transfer test**

515 For the transfer test we do not provide a reward or punishment, and test the models using the  
516 procedure for Training, substituting the transfer test stimuli for the training stimuli. Two sets of  
517 transfer stimuli are used, and four repetitions (left and right arm with each stimulus) are used for  
518 each set of stimuli.

## 519 **Testing performance of the full model in other conditioning tasks**

520 In addition to solving the DMTS and DNMTS tasks, we must validate that our proposed model  
521 can also perform a set of conditioning tasks that are associated with the mushroom bodies in  
522 bees, without our additional PCT circuits affecting performance. Importantly, these tasks are all  
523 performed with exactly the same model parameters that are used in the DMTS and DNMTS tasks,  
524 yet match the timescales and relative performances found in experiments performed on real bees.  
525 We choose four tasks, which comprise olfactory learning experiments using the proboscis extension

526 reflex (PER) that are performed on restrained bees as well as visual learning experiments performed  
527 with free flying bees (Figure 4).

#### 528 **Differential learning / reversal experimental procedure (Figure 4, panel B)**

529 These experiments follow the same protocol as the DMTS experiments, except that for the  
530 first fifteen trials one stimulus is always rewarded when the associated arm is chosen (no reward  
531 or punishment is given for choosing the non-associated arm), and subsequent to trial fifteen the  
532 other stimulus is rewarded when the associated arm is chosen. No pretraining or transfer trials are  
533 performed and the data is analysed for each trial rather than in blocks of 10 due to the speed of  
534 learning acquisition. 200 virtual bees are used for this experiment (see Figure 4, panel B for results,  
535 to be compared with *Giurfa (2004)*).

#### 536 **Proboscis Extension Reflex (PER) Experiments**

537 The Proboscis Extension Reflex (PER) is a classical conditioning experimental paradigm used  
538 with restrained bees. In this paradigm the bees are immobilised in small metal tubes with only  
539 the head and antennae exposed. Olfactory stimuli (conditioned stimuli) are then presented to  
540 the restrained bees in association with a sucrose solution reward (unconditioned stimulus) (see  
541 *Bitterman et al. (1983)* for full details).

542 For the PER experiments we separate the IN neurons as described in Section , however as the  
543 bees are restrained for these experiments we present odors following a pre-defined protocol, and  
544 the choices of the bee do not affect this protocol.

#### 545 **Single odor learning experimental procedure (Figure 4, panel A)**

546 In the single odor experiments we use the procedure outlined in *Bitterman et al (1983)*  
547 *et al. (1983)*. In this procedure acquisition and testing occur simultaneously. The real bees are  
548 presented an odor, and after a delay rewarded with sucrose solution. If the animal extends its  
549 proboscis within the delay period it is rewarded directly and considered to have responded, if it  
550 does not the PER is invoked by touching the sucrose solution to the antennae and the animal is  
551 rewarded but considered not to have responded. To match this protocol the performance of the  
552 model was recorded at each trial, with NOGO considered a failure to respond to the stimulus, and  
553 GO a response. At each trial a reward was given regardless of the model's performance.

#### 554 **Positive / negative patterning learning experimental procedure (Figure 4, panels C & D)**

555 In these experiments we follow the protocol described in *Deisig et al. (2001)*. We divide the  
556 training into blocks, each containing four presentations of an odor or odor combination. For positive  
557 patterning we do not reward individual odors A and B, but reward the combination AB (A-B-AB+). In  
558 negative patterning we reward the odors A and B, but not the combination AB (A+B-AB-). In both  
559 cases the combined odor is presented twice for each presentation of the individual odors, so a  
560 block for positive patterning is [A-,AB+,B-,AB+] for example, while for negative patterning a block is  
561 [A+,AB-,B+,AB-]. Performance is assessed as for the single odor learning experiment, with the two  
562 combined odor responses averaged within each block.

#### 563 **Software and implementation**

564 The reduced model was simulated in GNU Octave (*John W. Eaton David Bateman and Wehbring,*  
565 *2015*). The full model was created and simulated using the SpineML toolchain (*Richmond et al.,*  
566 *2013*) and the SpineCreator graphical user interface (*Cope et al., 2015*). These tools are open source  
567 and installation and usage information can be found on the SpineML website at <http://spineml.github.io/>.  
568 Input vectors for the IN neurons and the state engine for navigation of the Y-maze apparatus are  
569 simulated using a custom script written in the Python programming language (Python Software  
570 Foundation, <https://www.python.org/>) interfaced to the model over a TCP/IP connection.

571 Statistical tests were performed as in *Giurfa et al. (2001)* using 2x2  $X^2$  tests performed in *R (R*  
572 *Core Team, 2013)* using the `chisq.test()` function.

573 The code is available online at <http://github.com/BrainsOnBoard/bee-concept-learning>

## 574 Acknowledgements

575 We thank Martin Giurfa, Thomas Nowotny and James Bennett for their constructive comments on  
576 the manuscript. JARM and EV acknowledge support from the Engineering and Physical Sciences  
577 Research Council (grant numbers EP/J019534/1 and EP/P006094/1). JARM and ABB acknowledge  
578 support from a Royal Society International Exchanges Grant. ABB is supported by an Australian  
579 Research Council Future Fellowship Grant 140100452 and Australian Research Council Discovery  
580 Project Grant DP150101172.

## 581 References

- 582 **Arena P**, Patané L, Stornanti V, Termini PS, Zäpf B, Strauss R. Modeling the insect mushroom bodies: Application  
583 to a delayed match-to-sample task. *Neural Networks*. 2013 may; 41:202–211. [http://linkinghub.elsevier.com/  
584 retrieve/pii/S0893608012003127](http://linkinghub.elsevier.com/retrieve/pii/S0893608012003127), doi: 10.1016/j.neunet.2012.11.013.
- 585 **Avarguès-Weber A**, D’Amaro D, Metzler M, Dyer AG. Conceptualization of relative size by honeybees. *Frontiers*  
586 *in Behavioral Neuroscience*. 2014 mar; 8:80. [http://journal.frontiersin.org/article/10.3389/fnbeh.2014.00080/  
587 abstract](http://journal.frontiersin.org/article/10.3389/fnbeh.2014.00080/abstract), doi: 10.3389/fnbeh.2014.00080.
- 588 **Avarguès-Weber A**, Giurfa M. Conceptual learning by miniature brains. *Proceedings of the Royal Society of*  
589 *London B: Biological Sciences*. 2013; 280(1772).
- 590 **Baddeley AD**, Hitch G. Working Memory. In: *Psychology of Learning and Motivation* Elsevier; 1974.p. 47–89.  
591 <http://linkinghub.elsevier.com/retrieve/pii/S0079742108604521>, doi: 10.1016/S0079-7421(08)60452-1.
- 592 **Bazhenov M**, Huerta R, Smith BH. A computational framework for understanding decision making through  
593 integration of basic learning rules. *Journal of Neuroscience*. 2013; 33(13).
- 594 **Bitterman ME**, Menzel R, Fietz A, Schäfer S. Classical conditioning of proboscis extension in honeybees  
595 (*Apis mellifera*). *Journal of comparative psychology* (Washington, DC : 1983). 1983 jun; 97(2):107–19. [http:  
596 //www.ncbi.nlm.nih.gov/pubmed/6872507](http://www.ncbi.nlm.nih.gov/pubmed/6872507).
- 597 **Boitard C**, Devaud JM, Isabel G, Giurfa M. GABAergic feedback signaling into the calyces of the mushroom  
598 bodies enables olfactory reversal learning in honey bees. *Frontiers in Behavioral Neuroscience*. 2015 jul; 9.  
599 <http://journal.frontiersin.org/Article/10.3389/fnbeh.2015.00198/abstract>, doi: 10.3389/fnbeh.2015.00198.
- 600 **Cope AJ**, Richmond P, James SS, Gurney K, Allerton DJ. SpineCreator: A graphical user interface for the  
601 creation of layered neural models. In-press. 2015 sep; <http://www.ncbi.nlm.nih.gov/pubmed/27628934>, doi:  
602 10.1007/s12021-016-9311-z.
- 603 **Daehler MW**, Greco C. Memory in very young children. In: *Cognitive Learning and Memory in Children* Springer  
604 New York; 1985.p. 49–79. [http://link.springer.com/10.1007/978-1-4613-9544-7\\_2](http://link.springer.com/10.1007/978-1-4613-9544-7_2), doi: 10.1007/978-1-4613-  
605 9544-7\_2.
- 606 **D’Amato MR**, Salmon DP, Colombo M. Extent and limits of the matching concept in monkeys (*Cebus apella*).  
607 *Journal of Experimental Psychology: Animal Behavior Processes*. 1985; 11(1):35–51. [http://doi.apa.org/getdoi.  
608 cfm?doi=10.1037/0097-7403.11.1.35](http://doi.apa.org/getdoi.cfm?doi=10.1037/0097-7403.11.1.35), doi: 10.1037/0097-7403.11.1.35.
- 609 **Deisig N**, Lachnit H, Giurfa M, Hellstern F. Configural olfactory learning in honeybees: negative and positive  
610 patterning discrimination. *Learning & memory* (Cold Spring Harbor, NY). 2001; 8(2):70–8. [http://www.ncbi.  
611 nlm.nih.gov/pubmed/11274252](http://www.ncbi.nlm.nih.gov/pubmed/11274252)<http://www.pubmedcentral.nih.gov/articlerender.fcgi?artid=PMC311365>, doi:  
612 10.1101/m.38301.
- 613 **Devaud JM**, Papouin T, Carcaud J, Sandoz JC, Grünewald B, Giurfa M. Neural substrate for higher-order learning  
614 in an insect: mushroom bodies are necessary for configural discriminations. *Proceedings of the National*  
615 *Academy of Sciences of the United States of America*. 2015 oct; 112(43):E5854–62. [http://www.ncbi.nlm.  
616 nih.gov/pubmed/26460021](http://www.ncbi.nlm.nih.gov/pubmed/26460021)<http://www.pubmedcentral.nih.gov/articlerender.fcgi?artid=PMC4629335>, doi:  
617 10.1073/pnas.1508422112.
- 618 **Diekamp B**, Kalt T, Güntürkün O. Working memory neurons in pigeons. *The Journal of Neuroscience*. 2002; .
- 619 **Sposito U**, Giugliano M, Vasilaki E. Adaptation of short-term plasticity parameters via error-driven learning  
620 may explain the correlation between activity-dependent synaptic properties, connectivity motifs and target  
621 specificity. *Frontiers in computational neuroscience*. 2014; 8.



- 622 **Fahrbach SE.** Structure of the mushroom bodies of the insect brain. *Annual Review of Entomology*. 2006 jan;  
623 51(1):209–232. <http://www.annualreviews.org/doi/10.1146/annurev.ento.51.110104.150954>, doi: 10.1146/an-  
624 nurev.ento.51.110104.150954.
- 625 **Galizia CG.** Olfactory coding in the insect brain: data and conjectures. *European Journal of Neuroscience*. 2014  
626 jun; 39(11):1784–1795. <http://doi.wiley.com/10.1111/ejn.12558>, doi: 10.1111/ejn.12558.
- 627 **Ganeshina O, Menzel R.** GABA-immunoreactive neurons in the mushroom bodies of the honeybee: an electron  
628 microscopic study. *The Journal of comparative neurology*. 2001 aug; 437(3):335–49. [http://www.ncbi.nlm.nih.  
629 gov/pubmed/11494260](http://www.ncbi.nlm.nih.gov/pubmed/11494260).
- 630 **Giurfa M, Zhang S, Jenett A, Menzel R, Srinivasan MV.** The concepts of ‘sameness’ and ‘difference’ in an insect.  
631 *Nature*. 2001 apr; 410(6831):930–3. <http://www.ncbi.nlm.nih.gov/pubmed/11309617>[http://dx.doi.org/10.  
632 1038/35073582](http://dx.doi.org/10.1038/35073582), doi: 10.1038/35073582.
- 633 **Giurfa M.** Conditioning procedure and color discrimination in the honeybee *Apis mellifera*. *Naturwissenschaften*.  
634 2004 may; 91(5):228–231. <http://link.springer.com/10.1007/s00114-004-0530-z>, doi: 10.1007/s00114-004-  
635 0530-z.
- 636 **Giurfa M.** Behavioral and neural analysis of associative learning in the honeybee: a taste from the magic well.  
637 *Journal of comparative physiology A, Neuroethology, sensory, neural, and behavioral physiology*. 2007 aug;  
638 193(8):801–24. <http://www.ncbi.nlm.nih.gov/pubmed/17639413>, doi: 10.1007/s00359-007-0235-9.
- 639 **Haehnel M, Menzel R.** Sensory representation and learning-related plasticity in mushroom body extrinsic  
640 feedback neurons of the protocerebral tract. *Frontiers in Systems Neuroscience*. 2010; 4:161. [http://journal.  
641 frontiersin.org/article/10.3389/fnsys.2010.00161/abstract](http://journal.frontiersin.org/article/10.3389/fnsys.2010.00161/abstract), doi: 10.3389/fnsys.2010.00161.
- 642 **Hattori D, Aso Y, Swartz KJ, Rubin GM, Abbott LF, Axel R.** Representations of Novelty and Familiarity in a  
643 Mushroom Body Compartment. *Cell*. 2017 may; 169(5):956–969.e17. [http://www.ncbi.nlm.nih.gov/pubmed/  
644 28502772](http://www.ncbi.nlm.nih.gov/pubmed/28502772), doi: 10.1016/j.cell.2017.04.028.
- 645 **Heisenberg M.** Mushroom body memoir: from maps to models. *Nature Reviews Neuroscience*. 2003 apr;  
646 4(4):266–275. <http://www.nature.com/doi/10.1038/nrn1074>, doi: 10.1038/nrn1074.
- 647 **Huerta R, Nowotny T.** Fast and robust learning by reinforcement signals: explorations in the insect brain.  
648 *Neural Computation*. 2009 aug; 21(8):2123–2151. [http://www.mitpressjournals.org/doi/abs/10.1162/neco.  
649 2009.03-08-733](http://www.mitpressjournals.org/doi/abs/10.1162/neco.2009.03-08-733), doi: 10.1162/neco.2009.03-08-733.
- 650 **Huerta R, Nowotny T, García-Sánchez M, Abarbanel HDI, Rabinovich MI.** Learning Classification in  
651 the Olfactory System of Insects. *Neural Computation*. 2004 aug; 16(8):1601–1640. [http://www.ncbi.  
652.nlm.nih.gov/pubmed/15228747](http://www.ncbi.nlm.nih.gov/pubmed/15228747)<http://www.mitpressjournals.org/doi/10.1162/089976604774201613>, doi:  
653 10.1162/089976604774201613.
- 654 **James W.** *The principles of psychology, vol. 1.* Holt; 1890.
- 655 **John W Eaton David Bateman SH, Wehbring R.** {GNU Octave} version 4.0.0 manual: a high-level interactive lan-  
656 guage for numerical computations. GNUOctave; 2015. <http://www.gnu.org/software/octave/doc/interpreter>.
- 657 **Katz JS, Wright AA, Bodily KD.** Issues in the comparative cognition of abstract-concept learning. *Comparative  
658 cognition & behavior reviews*. 2007 jan; 2:79–92. <http://www.ncbi.nlm.nih.gov/pubmed/20228966>[http://www.  
659 pubmedcentral.nih.gov/articlerender.fcgi?artid=PMC2836729](http://www.pubmedcentral.nih.gov/articlerender.fcgi?artid=PMC2836729), doi: 10.3819/ccbr.2008.20005.
- 660 **Lind J, Enquist M, Ghirlanda S.** Animal memory: A review of delayed matching-to-sample data. *Be-  
661 havioural Processes*. 2015 aug; 117:52–58. [http://linkinghub.elsevier.com/retrieve/pii/S0376635714003027,  
662 doi: 10.1016/j.beproc.2014.11.019](http://linkinghub.elsevier.com/retrieve/pii/S0376635714003027).
- 663 **Lloyd Morgan C.** *An introduction to comparative psychology.* London: W Scott Publishing Co; 1903.
- 664 **Matsumoto Y, Menzel R, Sandoz JC, Giurfa M.** Revisiting olfactory classical conditioning of the proboscis  
665 extension response in honey bees: A step toward standardized procedures. *Journal of Neuroscience  
666 Methods*. 2012 oct; 211(1):159–167. [http://linkinghub.elsevier.com/retrieve/pii/S0165027012003299,  
667 doi: 10.1016/j.jneumeth.2012.08.018](http://linkinghub.elsevier.com/retrieve/pii/S0165027012003299).
- 668 **Menzel R.** Searching for the memory trace in a mini-brain, the honeybee. *Learning & memory (Cold Spring  
669 Harbor, NY)*. 2001; 8(2):53–62. <http://www.ncbi.nlm.nih.gov/pubmed/11274250>, doi: 10.1101/lm.38801.

- 670 **Mikhalevich I.** Experiment and Animal Minds: Why the Choice of the Null Hypothesis Matters. *Philosophy of*  
671 *Science*. 2015; 82(5):1059–1069.
- 672 **Miller EK, Nieder A, Freedman DJ, Wallis JD.** Neural correlates of categories and concepts. *Current opinion in*  
673 *neurobiology*. 2003 apr; 13(2):198–203. <http://www.ncbi.nlm.nih.gov/pubmed/12744974>.
- 674 **Mobbs PG.** The brain of the honeybee *Apis Mellifera*. I. The connections and spatial organization of the  
675 mushroom bodies. *Philosophical Transactions of the Royal Society of London B: Biological Sciences*. 1982;  
676 298(1091).
- 677 **Moore TL, Schettler SP, Killiany RJ, Rosene DL, Moss MB.** Impairment in delayed nonmatching to sample following  
678 lesions of dorsal prefrontal cortex. *Behavioral neuroscience*. 2012 dec; 126(6):772–80. <http://www.ncbi.nlm.nih.gov/pubmed/23088539><http://www.pubmedcentral.nih.gov/articlerender.fcgi?artid=PMC3518867>, doi:  
679 10.1037/a0030493.  
680
- 681 **Okada R, Rybak J, Manz G, Menzel R.** Learning-related plasticity in PE1 and other mushroom body-extrinsic  
682 neurons in the honeybee brain. *Journal of Neuroscience*. 2007; 27(43).
- 683 **Papadopoulou M, Cassenaer S, Nowotny T, Laurent G.** Normalization for Sparse Encoding of Odors by a  
684 Wide-Field Interneuron. *Science*. 2011; 332(6030). <http://science.sciencemag.org/content/332/6030/721.full>.
- 685 **Peng F, Chittka L.** A simple computational model of the bee mushroom body can explain seemingly complex  
686 forms of olfactory learning and memory. *Current biology : CB*. 2016 dec; 0(0):2597–2604. <http://www.ncbi.nlm.nih.gov/pubmed/28017607>, doi: 10.1016/j.cub.2016.10.054.  
687
- 688 **Perry CJ, Barron AB.** Neural mechanisms of reward in insects. *Annual Review of Entomology*. 2013 jan; 58(1):543–  
689 562. <http://www.annualreviews.org/doi/10.1146/annurev-ento-120811-153631>, doi: 10.1146/annurev-ento-  
690 120811-153631.
- 691 **Piaget J, Inhelder B.** The psychology of the child. Basic books; 1969.
- 692 **Premack D.** On the abstractness of human concepts: Why it would be difficult to talk to a pigeon. *Cognitive*  
693 *processes in animal behavior*. 1978; p. 423–451.
- 694 **Premack D, Premack AJ.** The mind of an ape; 1983.
- 695 **R Core Team, R:** A Language and Environment for Statistical Computing. Vienna, Austria; 2013. <http://www.r-project.org/>.  
696
- 697 **Richmond P, Buesing L, Giugliano M, Vasilaki E.** Democratic Population Decisions Result in Robust Policy-  
698 Gradient Learning: A Parametric Study with GPU Simulations. *PLoS ONE*. 2011 may; 6(5):e18539. <http://dx.plos.org/10.1371/journal.pone.0018539>, doi: 10.1371/journal.pone.0018539.  
699
- 700 **Richmond P, Cope A, Gurney K, Allerton DJ.** From model specification to simulation of biologically constrained  
701 networks of spiking neurons. *Neuroinformatics*. 2013 nov; 12(2):307–23. <http://www.ncbi.nlm.nih.gov/pubmed/24253973>, doi: 10.1007/s12021-013-9208-z.  
702
- 703 **Rybak J, Menzel R.** Anatomy of the mushroom bodies in the honey bee brain: the neuronal connections of the  
704 alpha-lobe. *The Journal of comparative neurology*. 1993 aug; 334(3):444–65. <http://www.ncbi.nlm.nih.gov/pubmed/8376627>, doi: 10.1002/cne.903340309.  
705
- 706 **Schwaerzel M, Monastirioti M, Scholz H, Friggi-Grelin F, Birman S, Heisenberg M.** Dopamine and octopamine  
707 differentiate between aversive and appetitive olfactory memories in *Drosophila*. *Journal of Neuroscience*.  
708 2003; 23(33).
- 709 **Seger CA, Miller EK.** Category learning in the brain. *Annual Review of Neuroscience*. 2010 jun;  
710 33(1):203–219. <http://www.annualreviews.org/doi/10.1146/annurev.neuro.051508.135546>, doi: 10.1146/an-  
711 nurev.neuro.051508.135546.
- 712 **Sober E.** Ockham's razors. Cambridge University Press; 2015.
- 713 **Søvik E, Perry CJ, Barron AB.** Chapter Six – insect reward systems: comparing flies and bees. In: *Advances in*  
714 *Insect Physiology*, vol. 48; 2015.p. 189–226. doi: 10.1016/bs.aiip.2014.12.006.
- 715 **Strausfeld NJ.** Arthropod brains: evolution, functional elegance, and historical significance. Belknap Press of  
716 Harvard University Press Cambridge; 2012.

- 717 **Strube-Bloss MF**, Nawrot MP, Menzel R. Mushroom body output neurons encode odor-reward associations.  
718 *Journal of Neuroscience*. 2011; 31(8).
- 719 **Szyszka P**, Galkin A, Menzel R. Associative and non-associative plasticity in kenyon cells of the  
720 honeybee mushroom body. *Frontiers in systems neuroscience*. 2008; 2:3. <http://www.ncbi.nlm.nih.gov/pubmed/18958247><http://www.pubmedcentral.nih.gov/articlerender.fcgi?artid=PMC2526274>, doi:  
721 [10.3389/neuro.06.003.2008](https://doi.org/10.3389/neuro.06.003.2008).  
722
- 723 **Thompson RK**, Oden DL. A profound disparity revisited: Perception and judgment of abstract identity relations  
724 by chimpanzees, human infants, and monkeys. *Behavioural processes*. 1995 dec; 35(1-3):149–61. <http://www.ncbi.nlm.nih.gov/pubmed/24896027>.  
725
- 726 **Tsodyks MV**, Markram H. The neural code between neocortical pyramidal neurons depends on neurotransmitter  
727 release probability. *Proceedings of the National Academy of Sciences*. 1997; 94(2):719–723.
- 728 **Tsujimoto S**, Genovesio A, Wise SP. Comparison of strategy signals in the dorsolateral and orbital prefrontal  
729 cortex. *Journal of Neuroscience*. 2011 mar; 31(12):4583–4592. <http://www.jneurosci.org/cgi/doi/10.1523/JNEUROSCI.5816-10.2011>, doi: [10.1523/JNEUROSCI.5816-10.2011](https://doi.org/10.1523/JNEUROSCI.5816-10.2011).  
730
- 731 **Vasilaki E**, Frémaux N, Urbanczik R, Senn W, Gerstner W. Spike-Based Reinforcement Learning in Contin-  
732 uous State and Action Space: When Policy Gradient Methods Fail. *PLoS Computational Biology*. 2009 dec;  
733 5(12):e1000586. <http://dx.plos.org/10.1371/journal.pcbi.1000586>, doi: [10.1371/journal.pcbi.1000586](https://doi.org/10.1371/journal.pcbi.1000586).
- 734 **Vasilaki E**, Giugliano M. Emergence of connectivity motifs in networks of model neurons with short-and  
735 long-term plastic synapses. *PLoS One*. 2014; 9(1):e84626.
- 736 **Wallis JD**, Anderson KC, Miller EK. Single neurons in prefrontal cortex encode abstract rules. *Nature*. 2001 jun;  
737 411(6840):953–956. <http://www.nature.com/doi/10.1038/35082081>, doi: [10.1038/35082081](https://doi.org/10.1038/35082081).
- 738 **Wright AA**. Testing the cognitive capacities of animals. *Learning and memory: The behavioral and biological*  
739 *substrates*. 1992; p. 45–60.
- 740 **Wright AA**. Concept learning and learning strategies. *Psychological Science*. 1997 mar; 8(2):119–123. <http://pss.sagepub.com/lookup/doi/10.1111/j.1467-9280.1997.tb00693.x>, doi: [10.1111/j.1467-9280.1997.tb00693.x](https://doi.org/10.1111/j.1467-9280.1997.tb00693.x).  
741
- 742 **Wright AA**, Katz JS. Mechanisms of same/different concept learning in primates and avians. *Behavioural*  
743 *Processes*. 2006; 72(3):234–254. doi: [10.1016/j.beproc.2006.03.009](https://doi.org/10.1016/j.beproc.2006.03.009).
- 744 **Wright AA**, Katz JS. Generalization hypothesis of abstract-concept learning: Learning strategies and related is-  
745 sues in *Macaca mulatta*, *Cebus apella*, and *Columba livia*. *Journal of Comparative Psychology*. 2007; 121(4):387–  
746 397. <http://doi.apa.org/getdoi.cfm?doi=10.1037/0735-7036.121.4.387>, doi: [10.1037/0735-7036.121.4.387](https://doi.org/10.1037/0735-7036.121.4.387).
- 747 **Yarden TS**, Nelken I. Stimulus-specific adaptation in a recurrent network model of primary auditory cortex.  
748 *PLoS computational biology*. 2017; 13(3):e1005437.
- 749 **Zhang S**, Bock F, Si A, Tautz J, Srinivasan MV. Visual working memory in decision making by honey bees.  
750 *Proceedings of the National Academy of Sciences of the United States of America*. 2005 apr; 102(14):5250–  
751 5. <http://www.ncbi.nlm.nih.gov/pubmed/15795382>[http://www.pubmedcentral.nih.gov/articlerender.fcgi?](http://www.pubmedcentral.nih.gov/articlerender.fcgi?artid=PMC555688)  
752 [artid=PMC555688](http://www.pubmedcentral.nih.gov/articlerender.fcgi?artid=PMC555688), doi: [10.1073/pnas.0501440102](https://doi.org/10.1073/pnas.0501440102).
